# Supplementary material for: Limited caffeine consumption as first-line treatment in managing primary monosymptomatic enuresis in children: how effective is it? A randomised clinical trial
Source: HighWire-hosted journal article supplement (doi:10.1136/bmjpo-2023-001899), 2023-04-01
Supplement: bmjpo-2023-001899supp001_data_supplement.pdf [file bmjpo-2023-001899supp001_data_supplement.pdf]

# Clinical Trial Protocol

## Iranian Registry of Clinical Trials

12 Dec 2022

### The effect of caffeine restriction on enuresis in children 6 to 15 years old

#### Protocol summary

##### Study aim

The effect of caffeine restriction on enuresis in children 6 to 15 years old

##### Design

A clinical trial with a control group, with parallel groups, not blinded, randomized, no phase on 80 patients. For randomization, the regular randomization method was used one by one of the hospital patients.

##### Settings and conduct

The study will be performed on children aged 6 to 15 years in Golestan and Imam Reza (AS) hospitals from September 1400. To extract information, a checklist including children's demographic information and caffeine consumption and enuresis control is used. The amount of caffeine consumption in children was recorded based on the food frequency questionnaire and was calculated by N4 software. Counseling is given and the subjects are divided into two groups of control and intervention (caffeine restriction) by regular randomization (one in between). To collect the data, a table is set up and given to the children to record whether or not they have enuresis by mentioning the date. Children are asked to return one month later (to check for side effects and follow up on treatment) to have their enuresis checked or enuresis grade (severe / moderate / ..) checked. Children are followed up by not calling by phone and sending the enuresis recording table.

##### Participants/Inclusion and exclusion criteria

Inclusion criteria: children 6 to 15 years old with primary enuresis with normal urinalysis and culture tests and ultrasound of normal kidneys and urinary tract

##### Intervention groups

The intervention group included restriction of consumption of caffeinated foods. The control group included no restriction on the consumption of caffeinated foods

##### Main outcome variables

Changes in the incidence and severity of primary enuresis

#### General information

##### Reason for update

##### Acronym

##### IRCT registration information

IRCT registration number: **IRCT20180401039167N3**

Registration date: **2021-09-29, 1400/07/07**

Registration timing: **prospective**

Last update: **2021-09-29, 1400/07/07**

Update count: **0**

##### Registration date

2021-09-29, 1400/07/07

##### Registrant information

##### Name

Bijan Rezakhaniha

##### Name of organization / entity

##### Country

Iran (Islamic Republic of)

##### Phone

+98 21 2264 6431

##### Email address

reza.bijan1345@ajaums.ac.ir

##### Recruitment status

**Recruitment complete**

##### Funding source

##### Expected recruitment start date

2021-10-07, 1400/07/15

##### Expected recruitment end date

2021-11-06, 1400/08/15

##### Actual recruitment start date

empty

##### Actual recruitment end date

empty

##### Trial completion date

empty

##### Scientific title

The effect of caffeine restriction on enuresis in children 6

to 15 years old

### Public title

The effect of caffeine restriction on enuresis

### Purpose

Treatment

### Inclusion/Exclusion criteria

#### Inclusion criteria:

Children with primary enuresis Normal urine analysis and culture tests Normal ultrasound of the kidneys and urinary tract Age range 6 to 15 years

#### Exclusion criteria:

### Age

From **6 years** old to **15 years** old

### Gender

Both

### Phase

N/A

### Groups that have been masked

No information

### Sample size

Target sample size: **80**

### Randomization (investigator's opinion)

Randomized

### Randomization description

Regular person-to-person randomization in such a way that among the patients referred to the hospital with the initial enuresis complaint, we divide the eligible individuals into the study and intervention group one by one.

### Blinding (investigator's opinion)

Not blinded

### Blinding description

#### Placebo

Not used

### Assignment

Parallel

### Other design features

## Secondary Ids

empty

## Ethics committees

### 1

#### Ethics committee

##### Name of ethics committee

Ethics Committee of the University of Medical Sciences of the Army of the Islamic Republic of Iran

##### Street address

Army University of Medical Sciences., Etemadzadeh St., West Fatemi St., Tehran., Iran

##### City

tehran

##### Province

Tehran

##### Postal code

1411718541

#### Approval date

2021-09-14, 1400/06/23

### Ethics committee reference number

IR.AJAUMS.REC.1400.151

## Health conditions studied

### 1

#### Description of health condition studied

primary enuresis

#### ICD-10 code

F98.0

#### ICD-10 code description

Enuresis not due to a substance or known physiological condition

## Primary outcomes

### 1

#### Description

Create enuresis

#### Timepoint

Measurement of enuresis at the beginning of the study and one month later

#### Method of measurement

Record enuresis in the calendar

## Secondary outcomes

### 1

#### Description

The severity of enuresis

#### Timepoint

At the beginning of the study and a month later

#### Method of measurement

Record the number of enuresis days in the calendar

## Intervention groups

### 1

#### Description

Intervention group: In children 6 to 15 years old with primary enuresis, in this group, the limit of caffeine consumption per day is a maximum of two cups (1-2 cups per 100 cc of light tea containing less than 30 mg of caffeine, which is provided by the software N4 is calculated) applies.

#### Category

Treatment - Other

### 2

#### Description

Control group: In this group, the consumption of caffeinated foods includes a glass of cocoa milk (100 cc cup contains 2 to 7 mg of caffeine) and two to three cocoa ice creams per week (weighing 75 grams, each containing an average of 2.5 mg of caffeine) and one to two cups of tea (2 100 cc cups of medium color tea

containing less than 50 mg of caffeine) or coffee (75 cc each contains 25 to 35 mg of caffeine) or cappuccino (each 75 cc cup contains 30 to 40 mg of caffeine) and 2 to 3 cans of cola a week (each 300 cc can contain 20 to 30 mg of caffeine) and one chocolate a day (50 g each pack contains approximately 10 mg of caffeine) ) Or a chocolate cake (weighing 100 grams contains 5 to 7 mg of caffeine) or a chocolate biscuit (weighing 100 grams contains 4 to 6 mg of caffeine). In total, in the control group, the daily caffeine consumption was about 80 to 110 mg per day by N4 software.

**Category**

N/A

**Recruitment centers****1****Recruitment center****Name of recruitment center**

Imam Reza Hospital (501 Army)

**Full name of responsible person**

Bijan Reza Khaniha

**Street address**

Imam Reza Hospital (501 Army),, Etemadzadeh St.,West Fatemi St.,Tehran.,Iran

**City**

Tehran

**Province**

Tehran

**Postal code**

1411718541

**Phone**

+98 21 8609 6350

**Email**

lms@ajaums.ac.ir

**2****Recruitment center****Name of recruitment center**

Golestan Hospital

**Full name of responsible person**

Bijan Reza Khaniha

**Street address**

Golestan Hospital.,Shahid Sayad Shirazi Highway.,Tehran.,Iran

**City**

Tehran

**Province**

Tehran

**Postal code**

1411718541

**Phone**

+98 21 2277 1541

**Email**

lms@ajaums.ac.ir

**Sponsors / Funding sources****1****Sponsor****Name of organization / entity**

Artesh University of Medical Sciences

**Full name of responsible person**

Mojtaba yousefi zoshk

**Street address**

Army University of Medical Sciences., Etemadzadeh St.,West Fatemi St.,Tehran.,Iran

**City**

Tehran

**Province**

Tehran

**Postal code**

1411718541

**Phone**

+98 21 8609 6350

**Email**

lms@ajaums.ac.ir

**Grant name****Grant code / Reference number****Is the source of funding the same sponsor organization/entity?**

Yes

**Title of funding source**

Artesh University of Medical Sciences

**Proportion provided by this source**

100

**Public or private sector**

Public

**Domestic or foreign origin**

Domestic

**Category of foreign source of funding**

empty

**Country of origin****Type of organization providing the funding**

Academic

**Person responsible for general inquiries****Contact****Name of organization / entity**

Artesh University of Medical Sciences

**Full name of responsible person**

Bijan Rezakhaniha

**Position**

professor

**Latest degree**

Specialist

**Other areas of specialty/work**

Urology

**Street address**

Army University of Medical Sciences., Etemadzadeh St.,West Fatemi St.,Tehran.,Iran

**City**

Tehran

**Province**

Tehran

**Postal code**

1411718541

**Phone**

+98 21 8609 6350

**Email**

reza.bijan@yahoo.com

**Person responsible for scientific inquiries****Contact****Name of organization / entity**

Artesh University of Medical Sciences

**Full name of responsible person**

bijan rezakhaniha

**Position**

professor

**Latest degree**

Specialist

**Other areas of specialty/work**

Urology

**Street address**

Army University of Medical Sciences., Etemadzadeh St., West Fatemi St., Tehran., Iran

**City**

Tehran

**Province**

Tehran

**Postal code**

1411718541

**Phone**

+98 21 8609 6350

**Email**

reza.bijan@yahoo.com

**Person responsible for updating data****Contact****Name of organization / entity**

Artesh University of Medical Sciences

**Full name of responsible person**

bijan rezakhaniha

**Position**

professor

**Latest degree**

Specialist

**Other areas of specialty/work**

Urology

**Street address**

Army University of Medical Sciences., Etemadzadeh St., West Fatemi St., Tehran., Iran

**City**

Tehran

**Province**

Tehran

**Postal code**

1411718541

**Phone**

+98 21 8609 6350

**Email**

reza.bijan@yahoo.com

**Sharing plan****Deidentified Individual Participant Data Set (IPD)**

Undecided - It is not yet known if there will be a plan to make this available

**Study Protocol**

Undecided - It is not yet known if there will be a plan to make this available

**Statistical Analysis Plan**

Undecided - It is not yet known if there will be a plan to make this available

**Informed Consent Form**

Undecided - It is not yet known if there will be a plan to make this available

**Clinical Study Report**

Undecided - It is not yet known if there will be a plan to make this available

**Analytic Code**

Undecided - It is not yet known if there will be a plan to make this available

**Data Dictionary**

Undecided - It is not yet known if there will be a plan to make this available
