# Supplementary material for: Limited caffeine consumption as first-line treatment in managing primary monosymptomatic enuresis in children: how effective is it? A randomised clinical trial
Source: HighWire-hosted journal article supplement (doi:10.1136/bmjpo-2023-001899), 2023-04-01
Supplement: bmjpo-2023-001899supp002_data_supplement.pdf [file bmjpo-2023-001899supp002_data_supplement.pdf]

## EDITORIAL CERTIFICATE

This document certifies that the manuscript listed below was edited for proper English language, grammar, punctuation, spelling, and overall style by one or more of the highly qualified native English speaking editors at NedMedica

### Manuscript title:

Limited caffeine consumption as first-line treatment in managing primary monosymptomatic enuresis in children. How effective is it? A Randomized Clinical Trial

### Authors:

Sadra Rezakhaniha, Bijan Rezakhaniha, Soheila Siroosbakht

### Date Issued:

March 19, 2023

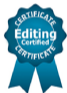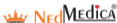

Dr. Seyed Mohammad Miri  
Managing Director

A blue handwritten signature of Dr. Seyed Mohammad Miri.
